# Supplementary material for: Experimentally testing and assessing the predictive power of species assembly rules for tropical canopy ants
Source: PubMed Central journal article supplement (PMC4342770; doi:10.1111/ele.12403), 2015-01-27

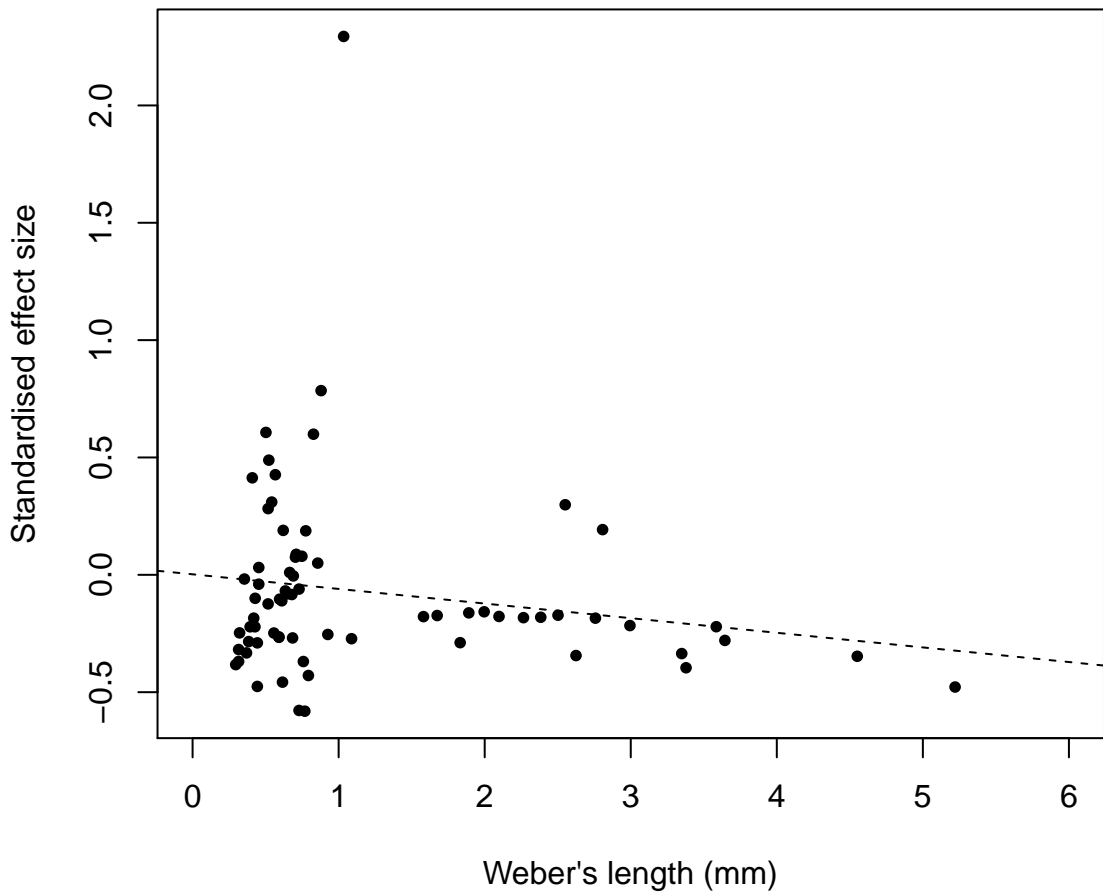

Supplement: ele0018-0254-sd6.pdf [file ele0018-0254-sd6.pdf]
